# Supplementary material for: Drinking Pattern, Abstention and Problem Drinking as Risk Factors for Depressive Symptoms: Evidence from Three Urban Eastern European Populations
Source: PLOS journal article supplement (doi:10.1371/journal.pone.0104384), 2014-08-13
Supplement: S1 (10.1371/journal.pone.0104384.s001) [file journal.pone.0104384.s001]

## **Table of Contents for Supporting Information 1**

Supporting Information 1 contains estimates from models relating the frequency of drinking > 60, 100 and 140 g in the past year to depressive symptoms.

In these models, the reference group are those who always drank < 60 g in a single sitting. As outlined in the main manuscript at doses of 100+ and 140+ g per occasion an additional category was included to represent those who drank above 60+ g but always less than X g per occasion (e.g. in the case of 100+ g, if someone drank 80g on a weekly basis they would fall in the category of “Never > 100 g per occasion”).

1. Table S1.1 - Descriptive information regarding frequency of > 60, 100 and 140 g in a single drinking occasion by country
2. Table S1.2 - Odds ratios (95% confidence intervals) for depressive symptoms by frequency of consuming > 60, 100 and 140 g in a single drinking occasion by country in men
3. Table S1.3 – Odds ratios (95% confidence intervals) for depressive symptoms by frequency of consuming > 60, 100 and 140 g in a single drinking occasion by country in women

**Table S1.1 – Descriptive information regarding frequency of > 60, 100 and 140 g in a single drinking occasion by country**

|                                   | Czech      |          |              |          | Russia     |          |              |          | Poland     |          |              |          |
|-----------------------------------|------------|----------|--------------|----------|------------|----------|--------------|----------|------------|----------|--------------|----------|
|                                   | <b>Men</b> |          | <b>Women</b> |          | <b>Men</b> |          | <b>Women</b> |          | <b>Men</b> |          | <b>Women</b> |          |
|                                   | <b>N</b>   | <b>%</b> | <b>N</b>     | <b>%</b> | <b>N</b>   | <b>%</b> | <b>N</b>     | <b>%</b> | <b>N</b>   | <b>%</b> | <b>N</b>     | <b>%</b> |
| <b>Frequency of X amount</b>      |            |          |              |          |            |          |              |          |            |          |              |          |
| <b>&gt; 60g</b>                   |            |          |              |          |            |          |              |          |            |          |              |          |
| Abstainer                         | 227        | 6.4      | 738          | 18.2     | 418        | 13.5     | 620          | 16.3     | 1090       | 22.8     | 2439         | 47.9     |
| Always < 60 g in a single sitting | 887        | 25       | 2091         | 51.5     | 444        | 14.3     | 2451         | 64.4     | 1511       | 31.6     | 2069         | 40.6     |
| 1-11 times per year               | 1091       | 30.8     | 837          | 20.6     | 579        | 18.7     | 464          | 12.2     | 1215       | 25.4     | 443          | 8.7      |
| 1-3 times per month               | 716        | 20.2     | 304          | 7.5      | 733        | 23.6     | 205          | 5.4      | 644        | 13.5     | 113          | 2.2      |
| Weekly                            | 620        | 17.5     | 90           | 2.2      | 927        | 29.9     | 67           | 1.8      | 317        | 6.6      | 31           | 0.6      |
| <b>&gt; 100g</b>                  |            |          |              |          |            |          |              |          |            |          |              |          |
| Abstainer                         | 227        | 6.4      | 738          | 18.2     | 418        | 13.5     | 620          | 16.3     | 1090       | 22.8     | 2439         | 47.9     |
| Always < 60 g in a single sitting | 887        | 25       | 2091         | 51.5     | 444        | 14.3     | 2451         | 64.4     | 1511       | 31.6     | 2069         | 40.6     |
| Never > 100g in a single sitting  | 863        | 24.4     | 724          | 17.8     | 814        | 26.2     | 609          | 16       | 805        | 16.9     | 401          | 7.9      |
| 1-11 times per year               | 924        | 26.1     | 384          | 9.5      | 486        | 15.7     | 79           | 2.1      | 914        | 19.1     | 148          | 2.9      |
| 1-3 times per month               | 419        | 11.8     | 89           | 2.2      | 474        | 15.3     | 34           | 0.9      | 326        | 6.8      | 30           | 0.6      |
| Weekly                            | 221        | 6.2      | 34           | 0.8      | 465        | 15       | 14           | 0.4      | 131        | 2.7      | 8            | 0.2      |
| <b>&gt; 140g</b>                  |            |          |              |          |            |          |              |          |            |          |              |          |
| Abstainer                         | 227        | 6.4      | 738          | 18.2     | 418        | 13.5     | 620          | 16.3     | 1090       | 22.8     | 2439         | 47.9     |
| Always < 60 g in a single sitting | 887        | 25       | 2091         | 51.5     | 444        | 14.3     | 2451         | 64.4     | 1511       | 31.6     | 2069         | 40.6     |
| Never > 140g in a single sitting  | 1551       | 43.8     | 996          | 24.5     | 1389       | 44.8     | 697          | 18.3     | 1389       | 29.1     | 507          | 10       |
| 1-11 times per year               | 583        | 16.5     | 166          | 4.1      | 400        | 12.9     | 27           | 0.7      | 530        | 11.1     | 62           | 1.2      |
| 1-3 times per month               | 193        | 5.5      | 44           | 1.1      | 244        | 7.9      | 10           | 0.3      | 188        | 3.9      | 14           | 0.3      |
| Weekly                            | 100        | 2.8      | 25           | 0.6      | 206        | 6.6      | 2            | 0.1      | 69         | 1.4      | 4            | 0.1      |

Some percentage totals may not equal 100 due to rounding

**Table S1.2 - Odds ratios (95% confidence intervals) for depressive symptoms by frequency of consuming > 60, 100 and 140 g in a single drinking occasion by country in men**

|                                   | <b>Czech (N=3541)</b> |                   | <b>Russia (N=3101)</b> |                    | <b>Poland (N=4777)</b> |                     |
|-----------------------------------|-----------------------|-------------------|------------------------|--------------------|------------------------|---------------------|
|                                   | Age adjusted          | Fully adjusted    | Age adjusted           | Fully adjusted     | Age adjusted           | Fully adjusted      |
| <b>Frequency of X amount</b>      |                       |                   |                        |                    |                        |                     |
| <b>&gt; 60g</b>                   |                       |                   |                        |                    |                        |                     |
| Abstainer                         | 1.73** [1.19,2.51]    | 1.54* [1.05,2.27] | 1.12 [0.79,1.58]       | 1.02 [0.71,1.47]   | 1.67*** [1.38,2.01]    | 1.59*** [1.31,1.94] |
| Always < 60 g in a single sitting | 1.00 (ref.)           | 1.00 (ref.)       | 1.00 (ref.)            | 1.00 (ref.)        | 1.00 (ref.)            | 1.00 (ref.)         |
| 1-11 times per year               | 0.88 [0.68,1.16]      | 0.98 [0.74,1.29]  | 0.77 [0.55,1.08]       | 0.77 [0.55,1.10]   | 0.88 [0.72,1.08]       | 0.88 [0.72,1.08]    |
| 1-3 times per month               | 0.97 [0.72,1.31]      | 1.04 [0.77,1.41]  | 0.83 [0.60,1.14]       | 0.75 [0.54,1.05]   | 0.95 [0.74,1.20]       | 0.86 [0.67,1.11]    |
| Weekly                            | 1.01 [0.75,1.37]      | 0.97 [0.71,1.34]  | 0.76 [0.56,1.04]       | 0.74 [0.53,1.02]   | 1.71*** [1.29,2.25]    | 1.48** [1.11,1.99]  |
| <b>&gt; 100g</b>                  |                       |                   |                        |                    |                        |                     |
| Abstainer                         | 1.72** [1.19,2.51]    | 1.54* [1.05,2.27] | 1.12 [0.79,1.58]       | 1.02 [0.71,1.47]   | 1.67*** [1.38,2.01]    | 1.60*** [1.31,1.94] |
| Always < 60 g in a single sitting | 1.00 (ref.)           | 1.00 (ref.)       | 1.00 (ref.)            | 1.00 (ref.)        | 1.00 (ref.)            | 1.00 (ref.)         |
| Never > 100g in a single sitting  | 1.11 [0.84,1.45]      | 1.20 [0.91,1.58]  | 0.83 [0.61,1.14]       | 0.83 [0.60,1.15]   | 0.91 [0.73,1.14]       | 0.89 [0.71,1.13]    |
| 1-11 times per year               | 0.72* [0.53,0.96]     | 0.78 [0.58,1.06]  | 0.67* [0.47,0.97]      | 0.68* [0.46,0.99]  | 0.93 [0.75,1.15]       | 0.92 [0.73,1.15]    |
| 1-3 times per month               | 0.89 [0.62,1.26]      | 0.87 [0.61,1.26]  | 0.74 [0.51,1.06]       | 0.65* [0.45,0.96]  | 1.12 [0.83,1.50]       | 0.98 [0.71,1.34]    |
| Weekly                            | 1.32 [0.88,1.96]      | 1.21 [0.80,1.83]  | 0.87 [0.60,1.24]       | 0.79 [0.54,1.15]   | 2.13*** [1.44,3.13]    | 1.62* [1.07,2.44]   |
| <b>&gt; 140g</b>                  |                       |                   |                        |                    |                        |                     |
| Abstainer                         | 1.73** [1.19,2.51]    | 1.55* [1.05,2.28] | 1.12 [0.79,1.58]       | 1.03 [0.71,1.48]   | 1.67*** [1.38,2.01]    | 1.59*** [1.31,1.94] |
| Always < 60 g in a single sitting | 1.00 (ref.)           | 1.00 (ref.)       | 1.00 (ref.)            | 1.00 (ref.)        | 1.00 (ref.)            | 1.00 (ref.)         |
| Never > 140g in a single sitting  | 0.92 [0.72,1.18]      | 1.00 [0.78,1.29]  | 0.80 [0.60,1.07]       | 0.79 [0.58,1.06]   | 0.93 [0.77,1.13]       | 0.91 [0.75,1.11]    |
| 1-11 times per year               | 0.72 [0.52,1.01]      | 0.76 [0.54,1.07]  | 0.48*** [0.31,0.74]    | 0.48** [0.31,0.75] | 1.06 [0.82,1.36]       | 1.01 [0.78,1.31]    |
| 1-3 times per month               | 1.37 [0.90,2.08]      | 1.25 [0.81,1.93]  | 1.07 [0.70,1.62]       | 0.95 [0.61,1.47]   | 1.13 [0.78,1.65]       | 0.93 [0.63,1.37]    |
| Weekly                            | 1.91* [1.16,3.16]     | 1.67 [0.99,2.80]  | 0.98 [0.62,1.53]       | 0.83 [0.52,1.32]   | 1.93* [1.14,3.27]      | 1.53 [0.88,2.65]    |

\*\*\* p < 0.001; \*\* p < 0.01; \* p < 0.05

‡ Full adjustment = age, marital status, educational attainment, material deprivation level and smoking status

**Table S1.3 - Odds ratios (95% confidence intervals) for depressive symptoms by frequency of consuming > 60, 100 and 140 g in a single drinking occasion by country in women**

|                                   | <b>Czech (N=4060)</b> |                    | <b>Russia (N=3807)</b> |                    | <b>Poland (N=5095)</b> |                     |
|-----------------------------------|-----------------------|--------------------|------------------------|--------------------|------------------------|---------------------|
|                                   | Age adjusted          | Fully adjusted     | Age adjusted           | Fully adjusted     | Age adjusted           | Fully adjusted      |
| <b>Frequency of X amount</b>      |                       |                    |                        |                    |                        |                     |
| <b>&gt; 60g</b>                   |                       |                    |                        |                    |                        |                     |
| Abstainer                         | 1.48*** [1.22,1.79]   | 1.30** [1.07,1.58] | 1.20 [0.99,1.44]       | 1.14 [0.94,1.37]   | 1.43*** [1.26,1.62]    | 1.35*** [1.18,1.54] |
| Always < 60 g in a single sitting | 1.00 (ref.)           | 1.00 (ref.)        | 1.00 (ref.)            | 1.00 (ref.)        | 1.00 (ref.)            | 1.00 (ref.)         |
| 1-11 times per year               | 1.06 [0.88,1.29]      | 1.10 [0.90,1.35]   | 0.91 [0.73,1.13]       | 0.85 [0.68,1.06]   | 1.24 [1.00,1.55]       | 1.17 [0.93,1.47]    |
| 1-3 times per month               | 0.95 [0.71,1.28]      | 0.95 [0.70,1.29]   | 1.25 [0.92,1.68]       | 1.21 [0.89,1.65]   | 1.29 [0.86,1.92]       | 1.20 [0.79,1.83]    |
| Weekly                            | 1.50 [0.94,2.39]      | 1.38 [0.85,2.24]   | 1.24 [0.74,2.06]       | 1.18 [0.70,1.99]   | 1.00 [0.46,2.18]       | 0.96 [0.43,2.17]    |
| <b>&gt; 100g</b>                  |                       |                    |                        |                    |                        |                     |
| Abstainer                         | 1.47*** [1.22,1.78]   | 1.30** [1.07,1.58] | 1.20 [0.99,1.44]       | 1.14 [0.94,1.38]   | 1.43*** [1.25,1.62]    | 1.35*** [1.17,1.54] |
| Always < 60 g in a single sitting | 1.00 (ref.)           | 1.00 (ref.)        | 1.00 (ref.)            | 1.00 (ref.)        | 1.00 (ref.)            | 1.00 (ref.)         |
| Never > 100g in a single sitting  | 1.29* [1.00,1.66]     | 1.32* [1.02,1.72]  | 1.03 [0.63,1.67]       | 0.98 [0.59,1.60]   | 1.53* [1.08,2.16]      | 1.48* [1.03,2.12]   |
| 1-11 times per year               | 1.37 [0.85,2.21]      | 1.30 [0.79,2.13]   | 3.25*** [1.63,6.49]    | 3.08** [1.52,6.23] | 2.79** [1.35,5.75]     | 2.83** [1.33,6.03]  |
| 1-3 times per month               | 2.46* [1.23,4.92]     | 1.95 [0.95,4.00]   | 1.30 [0.43,3.90]       | 0.95 [0.31,2.95]   | 1.47 [0.35,6.18]       | 1.54 [0.34,6.87]    |
| Weekly                            | 1.47*** [1.22,1.78]   | 1.30** [1.07,1.58] | 1.20 [0.99,1.44]       | 1.14 [0.94,1.38]   | 1.43*** [1.25,1.62]    | 1.35*** [1.17,1.54] |
| <b>&gt; 140g</b>                  |                       |                    |                        |                    |                        |                     |
| Abstainer                         | 1.48*** [1.22,1.79]   | 1.30** [1.07,1.59] | 1.20 [0.99,1.44]       | 1.14 [0.94,1.38]   | 1.43*** [1.25,1.62]    | 1.35*** [1.17,1.54] |
| Always < 60 g in a single sitting | 1.00 (ref.)           | 1.00 (ref.)        | 1.00 (ref.)            | 1.00 (ref.)        | 1.00 (ref.)            | 1.00 (ref.)         |
| Never > 140 g in a single sitting | 0.96 [0.80,1.16]      | 1.00 [0.83,1.22]   | 1.00 [0.83,1.20]       | 0.95 [0.79,1.15]   | 1.09 [0.88,1.35]       | 1.03 [0.83,1.29]    |
| 1-11 times per year               | 1.38 [0.97,1.98]      | 1.31 [0.91,1.89]   | 1.33 [0.60,2.92]       | 1.11 [0.50,2.47]   | 2.44*** [1.47,4.06]    | 2.12** [1.25,3.61]  |
| 1-3 times per month               | 1.81 [0.96,3.42]      | 1.60 [0.83,3.07]   | 2.22 [0.64,7.72]       | 1.86 [0.52,6.57]   | 3.24* [1.12,9.39]      | 3.12* [1.02,9.50]   |
| Weekly                            | 2.75* [1.24,6.12]     | 2.18 [0.96,4.95]   | 2.61 [0.16,41.92]      | 1.16 [0.07,19.97]  | 2.47 [0.35,17.60]      | 2.30 [0.30,17.53]   |

\*\*\* p < 0.001; \*\* p < 0.01; \* p < 0.05

‡ Full adjustment = age, marital status, educational attainment, material deprivation level and smoking status.
